# Supplementary material for: pH-responsive sodium alginate/CMCS/CMCNa composite hydrogel beads for sustained delivery of 5-fluorouracil-β-cyclodextrin inclusion complexes
Source: Royal Society of Chemistry journal article supplement (doi:10.1039/d6ra00194g), 2026-05-12
Supplement: d6ra00194g1.pdf [file d6ra00194g1.pdf]

## Supplementary material

Article

# pH-Responsive Sodium Alginate/CMCS/CMCNa Composite Hydrogel Beads for Sustained Delivery of 5-Fluorouracil- $\beta$ -Cyclodextrin Inclusion Complexes

Yaling Wu<sup>1</sup>, Peipei Xu<sup>1,3</sup>, Jing Lin<sup>1,3</sup>, WanJing Li<sup>1</sup>, Qing Lin<sup>1</sup>, Hanhao Lu<sup>2</sup>, Jingbo Chen<sup>2\*</sup>, Zhenhua Liu<sup>2\*</sup>, Yudong Lu<sup>3\*</sup>

<sup>1</sup> School of Materials and Chemical Engineering, Fuzhou Institute of Oceanography, Minjiang University, Fuzhou, Fujian 350108, China, 2934@mju.edu.cn.

<sup>2</sup> Department of Oncology, Shengli Clinical Medical College of Fujian Medical University, Fujian Provincial Hospital, Fuzhou University Affiliated Provincial Hospital, Fuzhou, 350001, China, cjbjfl@fjmu.edu.cn; liuzhenhua6909@163.com.

<sup>3</sup> College of Chemistry and Materials Science, Fujian Provincial Key Laboratory of advanced Oriented Chemical Engineer, Fujian Key Laboratory of Polymer Materials, Fujian Normal University, Fuzhou, Fujian 350117, China, luyd@fjnu.edu.cn.

\* Correspondence: cjbjfl@fjmu.edu.cn; liuzhenhua6909@163.com; luyd@fjnu.edu.cn; Tel.: (+86) 156-5916-8406

**Table S1.** Content of each component during the preparation of  $\beta$ -CD@5-Fu/CMCS/CMCNa/SA hydrogel beads.

| Samples | 3% $\beta$ -<br>CD@5-Fu<br>(wt%) | 0.8946%5-<br>Fu (wt%) | CMCS(wt%) | CMCNa<br>(wt%) | SA (wt%<br>) |
|---------|----------------------------------|-----------------------|-----------|----------------|--------------|
| 1       | 20 g                             | 0 g                   | 10 g      | 10 g           | 10 g         |
| 2       | 15 g                             | 0 g                   | 11.66 g   | 11.66 g        | 11.66 g      |
| 3       | 10 g                             | 0 g                   | 13.34 g   | 13.34 g        | 13.34 g      |
| 4       | 0 g                              | 20 g                  | 10 g      | 10 g           | 10 g         |
| 5       | 0 g                              | 15 g                  | 11.66 g   | 11.66 g        | 11.66 g      |
| 6       | 0 g                              | 10 g                  | 13.34 g   | 13.34 g        | 13.34 g      |
| 7       | 0g                               | 0g                    | 16.66g    | 16.66g         | 16.66g       |
| 8       | 0g                               | 0g                    | 0g        | 0g             | 50g          |

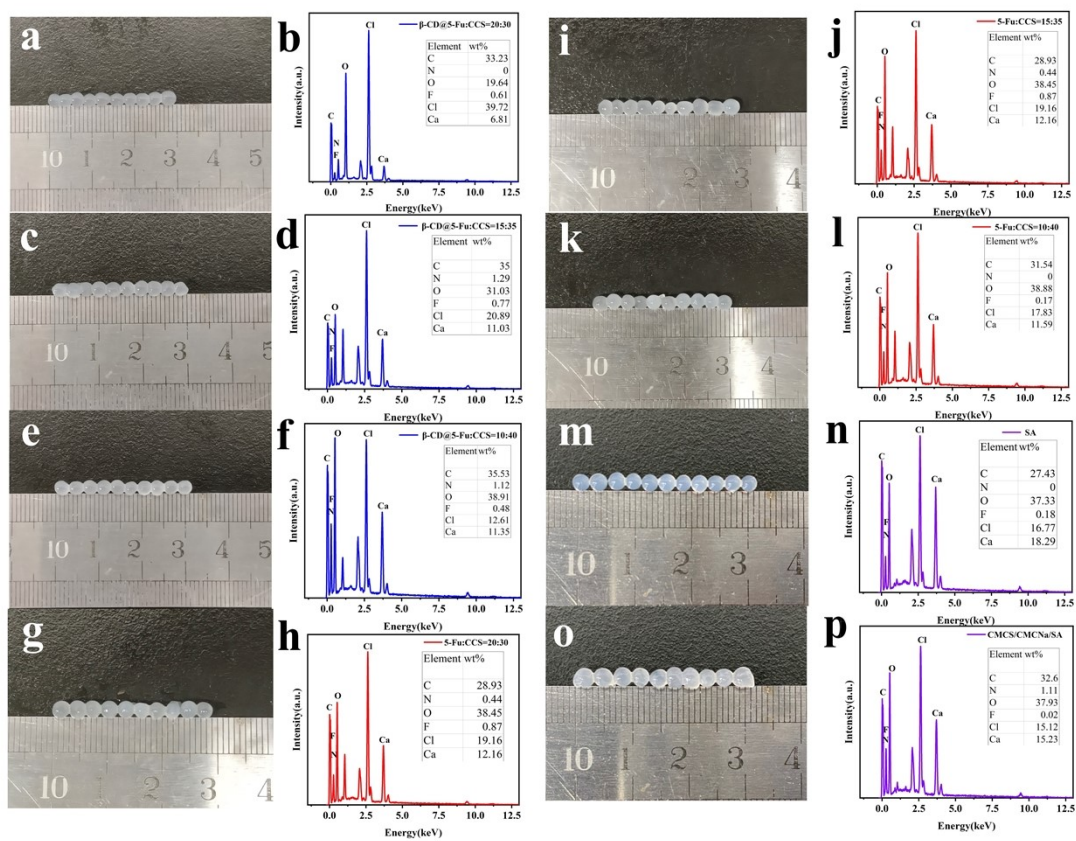

**Figure S1.** SEM images and elemental mapping of hydrogel beads: (a-f)  $\beta$ -CD@5-Fu-loaded (ratios 20:30, 15:35, 10:40); (g-l) 5-Fu-loaded (same ratios); (m-p) Controls: SA and CMCS/CMCNa/SA beads.

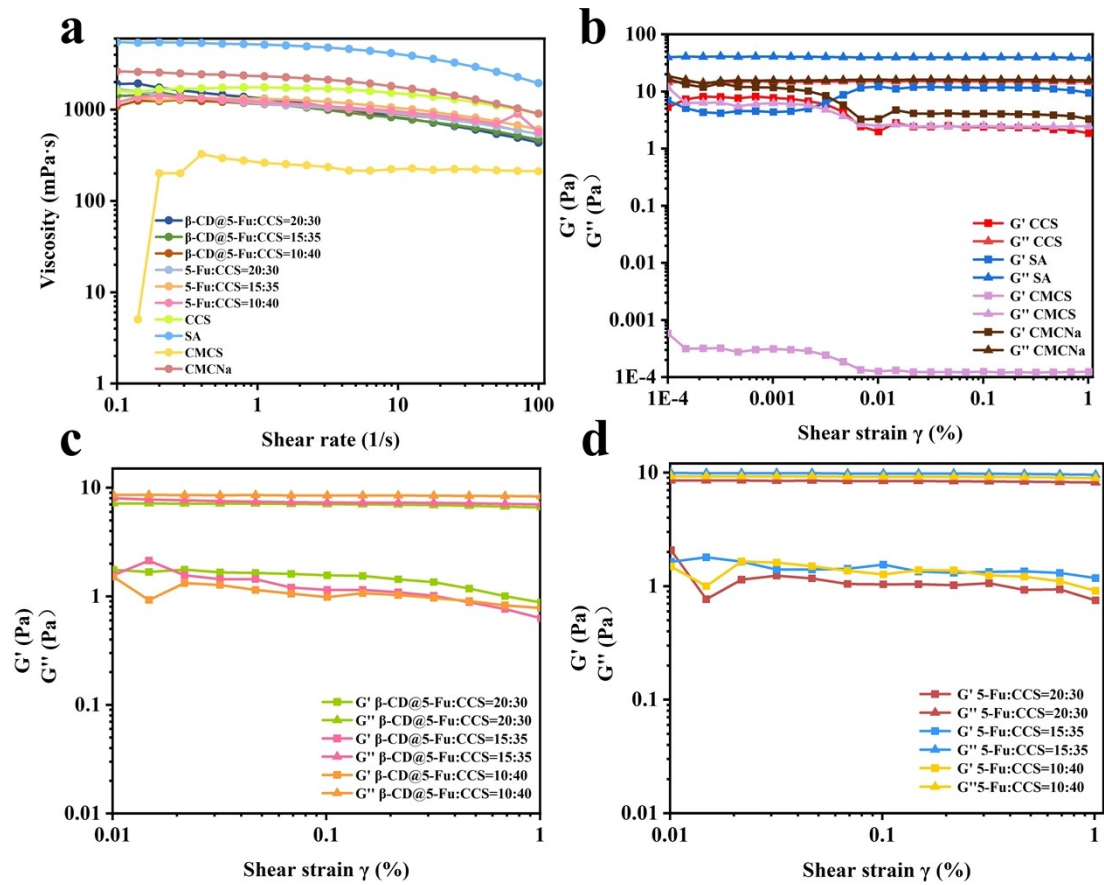

**Figure S2.** Rheological characterization of multi-component systems: Shear-dependent viscosity and strain-responsive moduli. (a) Viscosity profile; (b-d) Storage modulus ( $G'$ ) and loss modulus ( $G''$ ) evolution.

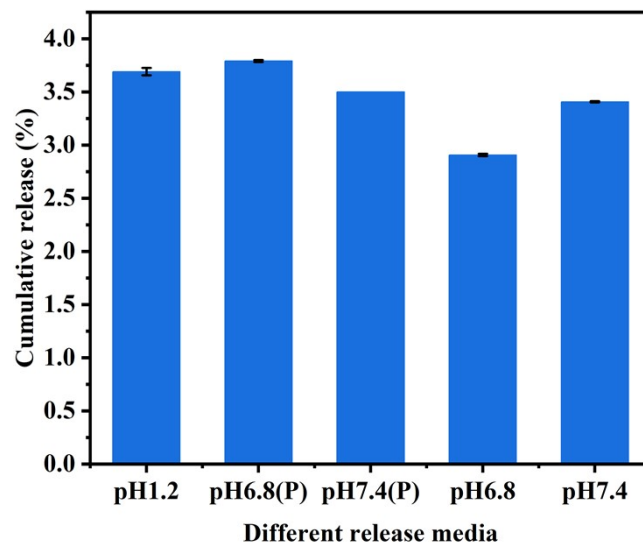

**Figure S3.** In vitro cumulative release (%) of  $\beta$ -CD@5-Fu/CMCS/CMCNa/SA hydrogel beads under various pH conditions (pH 1.2; pH 6.8 with and without phosphate; pH 7.4 with and without phosphate) at 37 °C over 24 h.
